# Supplementary material
Source: PubMed Central journal article supplement (PMC1933444)

A)

Other subtypes

B

E at pos 18 in Nef, context  
WPAVR\_E\_RMRRA

Amino Acids

- E
- D
- Q
- R
- K
- N
- S
- A

D is enriched  
in a subtype B  
subcluster, where  
B14 is rare, a  
subcluster driven  
relationship

- B14 host
- not B14 host
- Database subtyping  
reference strains

Simple Fisher's test,  $p = 0.003$   
Tree corrected  $p = 0.24$

0.02  
Branchlength

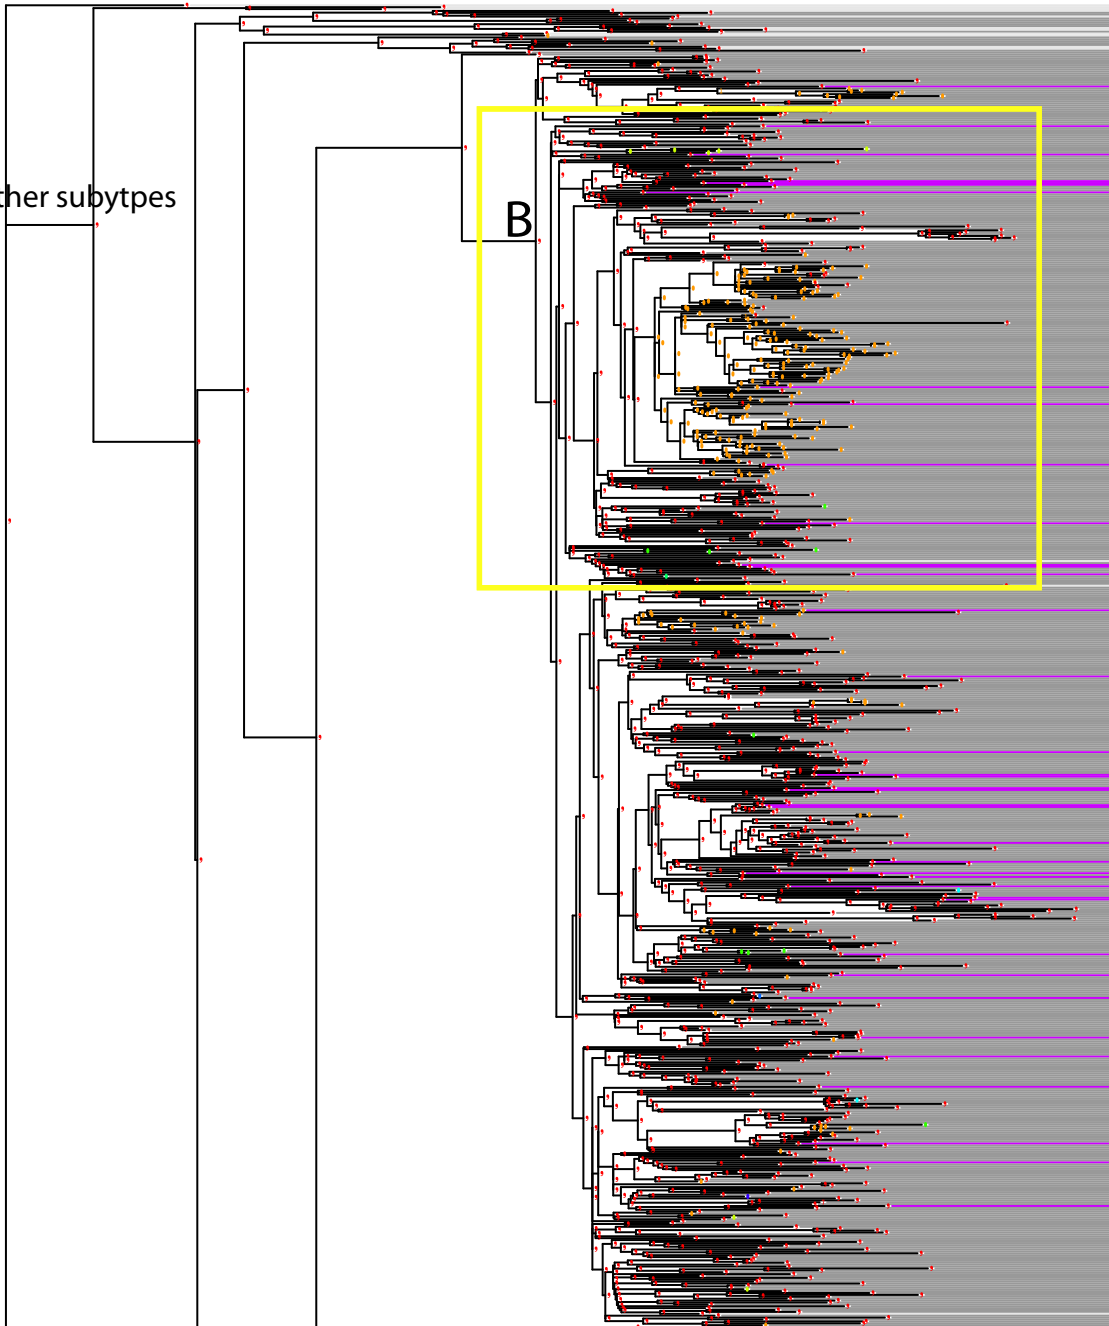

B)

B

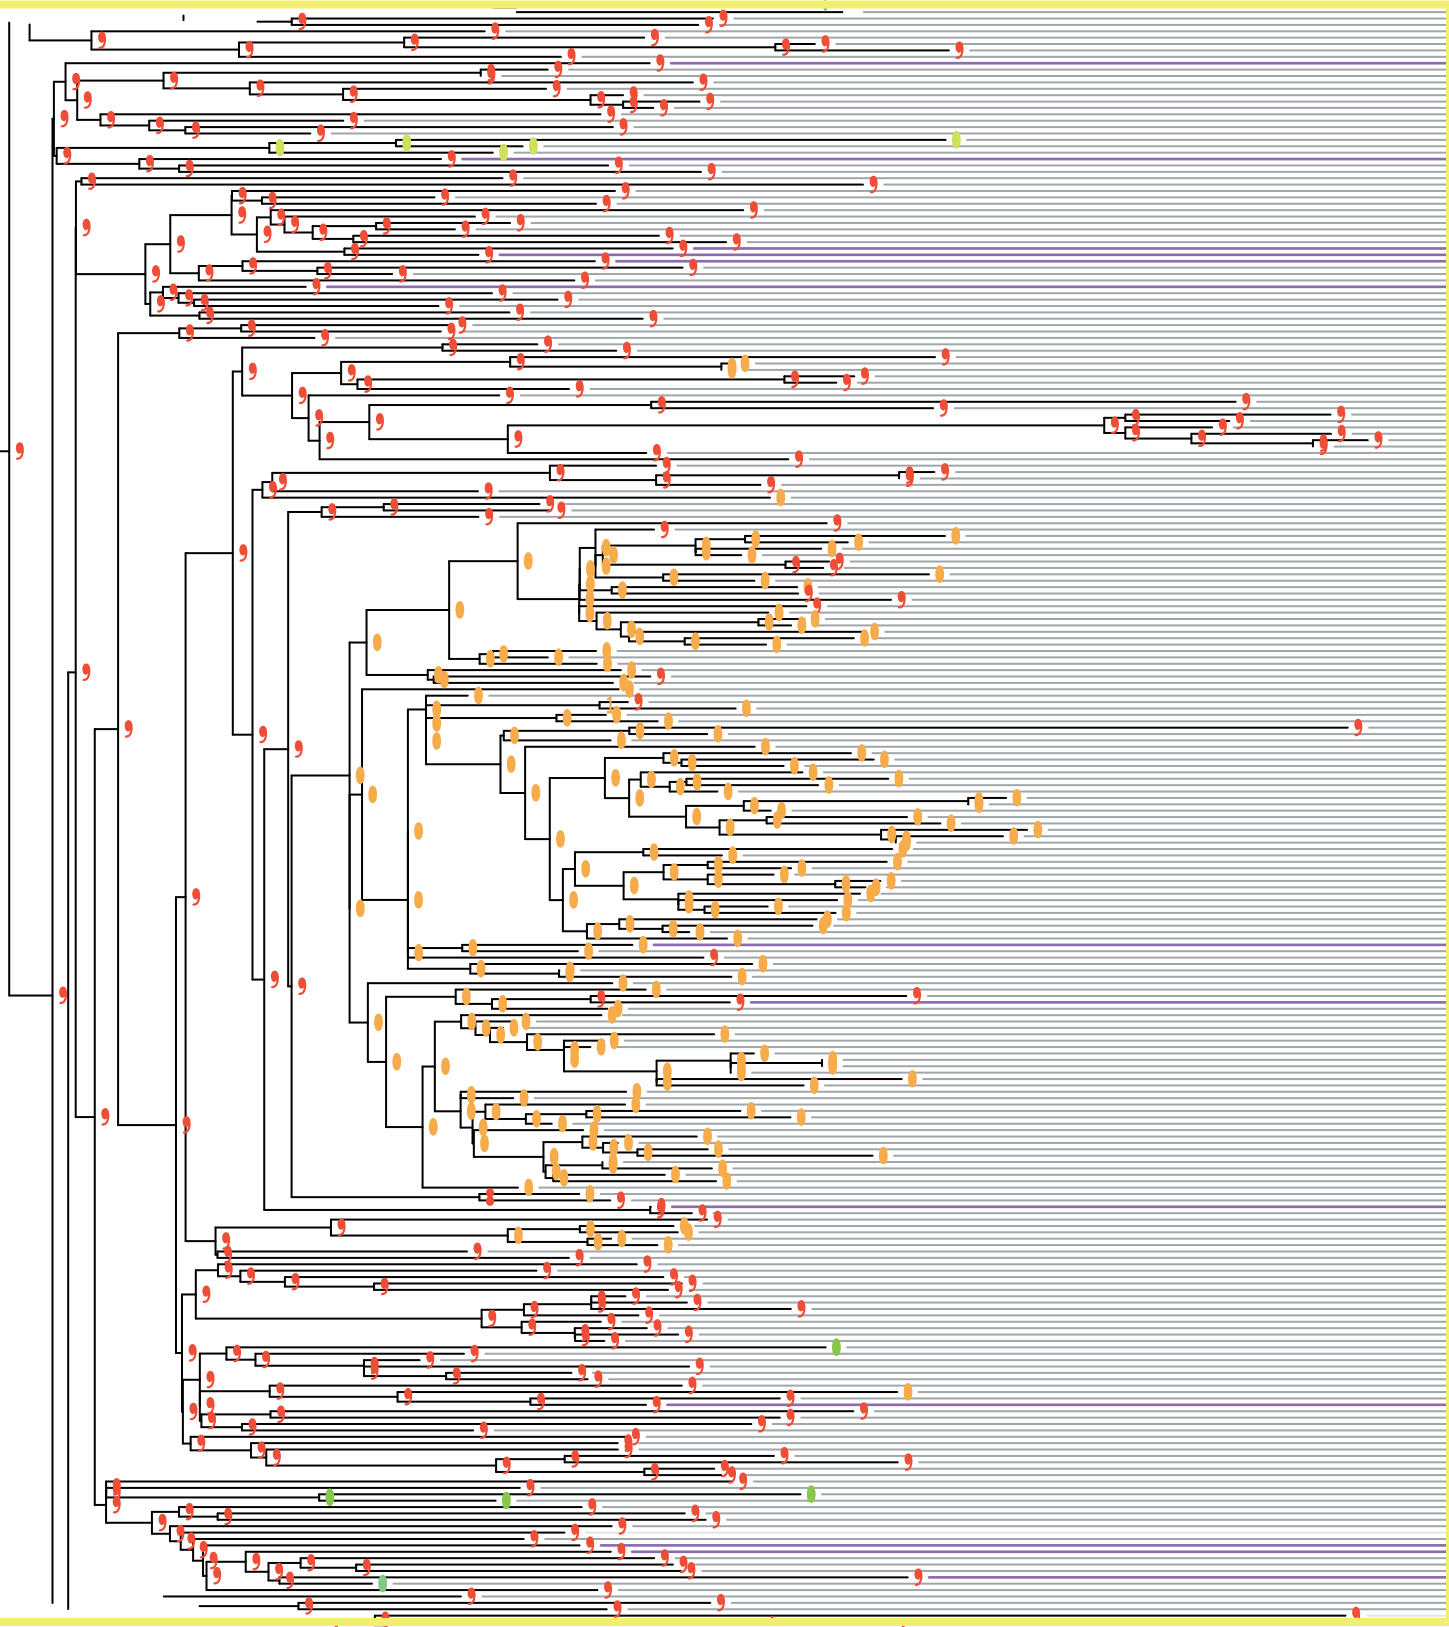

Supplement: ppat.0030094.sg001.pdf [file ppat.0030094.sg001.pdf]
